1 **TITLE:**

2 **Large-scale quantification of human osteocyte lacunar morphological**  
3 **biomarkers as assessed by ultra-high-resolution desktop micro-computed**  
4 **tomography**

5 **AUTHORS:** Elliott Goff<sup>1</sup>, Federica Buccino<sup>1</sup>, Chiara Bregoli<sup>1</sup>, Jonathan P. McKinley<sup>1,2</sup>, Basil  
6 Aeppli<sup>1</sup>, Robert R. Recker<sup>3</sup>, Elizabeth Shane<sup>4</sup>, Adi Cohen<sup>4</sup>, Gisela Kuhn<sup>1</sup>, Ralph Müller<sup>1\*</sup>

7 **AFFILIATIONS:**

8 <sup>1</sup> Institute for Biomechanics, ETH Zurich, Zurich, Switzerland

9 <sup>2</sup> Department of Mechanical Engineering, University of California Berkeley, Berkeley, CA, USA

10 <sup>3</sup> Department of Medicine, Creighton University Medical Center, Omaha, NE, USA

11 <sup>4</sup> Department of Medicine, Columbia University College of Physicians & Surgeons, New York,  
12 NY, USA

13

14 \*Corresponding author:

15 Prof. Ralph Müller, PhD

16 Institute for Biomechanics, ETH Zurich, Zurich, Switzerland

17 Leopold-Ruzicka-Weg 4, 8093, Zurich, Switzerland

18 E: ram@ethz.ch

19 T: +41 44 632 45 92

## 20 **ABSTRACT**

21 Ultra-high-resolution imaging of the osteocyte lacuno-canalicular network (LCN) three-  
22 dimensionally (3D) in a high-throughput fashion has greatly improved the morphological knowledge  
23 about the constituent structures – positioning them as potential biomarkers. Technologies such as  
24 serial focused ion beam/scanning electron microscopy (FIB/SEM) and confocal scanning laser  
25 microscopy (CLSM) can image in extremely high resolution, yet only capture a small number of  
26 lacunae. Synchrotron radiation computed tomography (SR-CT) can image with both high resolution  
27 and high throughput but has a limited availability. Desktop micro-computed tomography (micro-CT)  
28 provides an attractive balance: high-throughput imaging on the micron level without the restrictions  
29 of SR-CT availability. Over the past decade, desktop micro-CT has been used to image osteocyte  
30 lacunae in a variety of animals, yet few studies have employed it to image human lacunae using  
31 clinical biopsies.

32 In this study, accuracy, precision, and sensitivity of large-scale quantification of human  
33 osteocyte lacunar morphometries were assessed by ultra-high-resolution desktop micro-computed  
34 tomography. For this purpose, thirty-one transiliac human bone biopsies containing trabecular and  
35 cortical regions were imaged using ultra-high-resolution desktop micro-CT at a nominal isotropic  
36 voxel resolution of 1.2 $\mu$ m. The resulting 3D images were segmented, component labeled, and the  
37 following morphometric parameters of 7.71 million lacunae were measured: Lacunar number (Lc.N),  
38 density (Lc.N/BV), porosity (Lc.TV/BV), volume (Lc.V), surface area (Lc.S), surface area to volume ratio  
39 (Lc.S/Lc.V), stretch (Lc.St), oblateness (Lc.Ob), sphericity (Lc.Sr), equancy (Lc.Eq), and angle (Lc. $\theta$ ).

40 Accuracy was quantified by comparing automated lacunar segmentation to manual  
41 segmentation. Mean true positive rate (TPR), false positive rate (FPR), and false negative rate (FNR)  
42 were 89.0%, 3.4%, and 11.0%, respectively. Regarding the reproducibility of lacunar morphometry  
43 from repeated measurements, precision errors were low (0.2 – 3.0%) and intraclass correlation  
44 coefficients were high (0.960 – 0.999). Significant differences between cortical and trabecular regions

45 ( $p < 0.001$ ) existed for Lc.N/BV, Lc.TV/BV, local lacunar surface area (<Lc.S>), and local lacunar volume  
46 (<Lc.V>), all of which demonstrate the sensitivity of the method and are possible biomarker  
47 candidates. This study provides the rigorous foundation required for future large-scale morphometric  
48 studies using ultra-high-resolution desktop micro-CT and high-throughput analysis of millions of  
49 osteocyte lacunae in human bone samples. Furthermore, the validation of this technology for  
50 imaging of human lacunar properties establishes the quality and reliability required for the accurate,  
51 precise, and sensitive assessment of osteocyte morphometry in clinical bone biopsies.

## 52 INTRODUCTION

53 Bone as an organ provides humans with the necessary structural support to sustain  
54 locomotion and dynamic movement in daily life. The organ is uniquely capable of adapting its  
55 structure to meet the mechanical demands that are placed upon it [1]. This adaptation of bone has  
56 been described by Roux as bone (re)modeling [2]. Central to this process are the osteocytes: the  
57 most abundant bone cell type, embedded deeply within the bone matrix, and each ensconced within  
58 individual compartments called lacunae [2, 3]. Woven together by a large number of dendrites that  
59 extend from each cell, the lacuno-canalicular network (LCN) is one of the most intricately connected  
60 networks in the human body, and the scale is comparable with the network of neurons in the human  
61 brain [4]. Compelling studies over the last thirty years have revealed and emphasized the functional  
62 importance of the cells and processes within the LCN to sense mechanical signals, to transduce them  
63 into chemical signals, and to orchestrate the bone (re)modeling process through guided bone  
64 formation and bone resorption [5-10].

65 After cell death, the fossilized lacuna remains intact, allowing the lacuna's three-dimensional  
66 (3D) geometry to be extracted via several imaging techniques at the sub-micrometer resolution.  
67 Today, serial focused ion beam/scanning electron microscopy (FIB/SEM) possesses the highest spatial  
68 resolution in the nanometer range. Yet, while this technology allows for features like individual  
69 dendritic processes to be resolved, the depth range is a major limitation, and only a few dozen  
70 lacunae in the tissue can be captured simultaneously [11-14]. Other researchers have implemented  
71 confocal laser scanning microscopy (CLSM) to investigate lacunar geometry in mice [15, 16] and in  
72 clinical bone biopsies [17], but again the shallow tissue depth that can be explored is a limitation and  
73 hence only small subsections of bone consisting of a few dozen to a few hundred lacunae can be  
74 measured with CLSM. Both FIB/SEM and CLSM suffer from a lack of scalability since the time required  
75 for a study with more than a few hundred lacunae makes the technologies impractical for any type of  
76 large-scale lacunar analysis. Alternatively, several groups have used high-resolution x-ray-based  
77 approaches such as synchrotron radiation computed tomography (SR-CT). Several studies, Mader et

78 al. [18] in particular, have been successful in separating the porous lacunae from the surrounding  
79 matrix in a high-throughput fashion in complete intact mouse femurs [18-24]. However, SR-CT is an  
80 imaging tool that requires access to a beamline facility, of which only a few in the world exist, and  
81 hence the availability is limited for most researchers due to timing restrictions. A fourth imaging tool,  
82 conventional x-ray based ultra-high-resolution desktop micro-computed tomography (micro-CT),  
83 provides a reasonable balance between CLSM and SR-CT. Ultra-high-resolution desktop micro-CT  
84 allows for the extraction of millions of lacunae from complete bone biopsies without the need to  
85 request approval for limited time slots or experienced personnel at beamline facilities. Furthermore,  
86 desktop micro-CT is an established and validated technology that has been implemented for  
87 laboratory-based bone research for several decades [25-28]. Therefore, it is necessary that a  
88 technique be developed for large-scale, high-throughput imaging of osteocyte lacunar networks in  
89 clinical bone biopsies.

90 Equally as important as the 3D images acquired are the individual structures that are  
91 extracted from these images as well as the accurate, reproducible, and sensitive quantification of  
92 their morphometry. Specifically, with ultra-high-resolution osteocyte imaging, it is imperative that  
93 the lacunar morphometric parameters are well defined and measured accordingly. Great strides have  
94 been made towards the standardization of these metrics in recent years, and several studies have  
95 explored different basic measures such as lacunar density, shape, and orientation [18, 20, 21, 29-34].  
96 Mader et al. have most thoroughly described and validated both simple and abstract lacunar  
97 morphometric parameters, and hence this study follows their naming convention and mathematical  
98 definitions [18]. The combination of well-defined lacunar morphometric parameters and a rigorously  
99 validated imaging and analysis methodology allow for the emergence of biomarkers. These  
100 morphometric biomarkers have the potential to be used to differentiate between diseased and  
101 healthy bone, old and young bone, or even the region of bone within the body.

102 This study aims to provide researchers with a fully validated method of large-scale lacunar  
103 imaging, accurate automated segmentation, and measurements of each resulting 3D lacunar

104 structure using a technology that is widely accessible – ultra-high-resolution desktop micro-CT.  
105 Furthermore, we demonstrate the power of such a high-throughput analysis by measuring the  
106 morphometric parameters of millions of osteocyte lacunae in human bone samples, using the  
107 previously validated 3D lacunar metrics of Mader et al. [18]. The rigor of the method is confirmed by  
108 accurate image segmentation, a standard precision study [35], and the sensitive detection of  
109 differences between cortical and trabecular regions. Thorough validation highlights the value of the  
110 imaging method, and we believe this study will provide a rigorous foundation for future large-scale  
111 lacunar investigations.

112

## 113 **METHODS**

### 114 Human bone biopsy preparation

115 Thirty-one transiliac bone biopsy samples from premenopausal women already described in  
116 previous studies by Cohen et al. [36, 37] were used for this study. Biopsy samples had been obtained  
117 in women, aged 18-48, recruited as a reference population for studies of bone structure and  
118 metabolism in premenopausal women. Reference population subjects were required to have normal  
119 areal spine, hip, and forearm BMD by dual-energy x-ray absorptiometry (DXA; Z score  $\geq$  -1.0 at all  
120 sites), no history of adult low trauma fracture, and no historical or biochemical evidence of diseases  
121 or conditions known to affect skeletal integrity [36, 37]. All subjects provided written informed  
122 consent; studies had been approved by the institutional review boards of all participating  
123 institutions.

124 A hemi-cylinder fraction of each biopsy core, containing both cortical and trabecular regions,  
125 was embedded in individual polymethylmethacrylate (PMMA) disks with a 25mm diameter.  
126 Subsections of each sample were prepared to fit in the desktop micro-CT scanner, which limits the  
127 diameter to a 4.0mm field of view (FOV) in the ultra-high-resolution mode. Hence, each PMMA  
128 embedded core was cut three times parallel to the longitudinal axis of the biopsy using a circular

129 diamond blade (SCAN-DIA Minicut 40, SCAN-DIA GmbH & Co. KG, Germany) and custom-made  
130 mounts for sample fixation. This produced a rectangular block, which had the XY target dimensions  
131 of 4.25 +/- 0.1mm with the Z dimension depending on the original placement in the PMMA disk and  
132 ranging from 20-25mm. Each block was then turned on a conventional lathe (Schaublin 102, Bevilard,  
133 Switzerland) to create a final cylinder of 3.8 +/- 0.05mm diameter and a length ranging between 10  
134 and 15mm. The biopsy cylinder was then tightly fit into a custom sample holder as seen in Figure 1 to  
135 minimize motion artifacts and to maximize the volume scannable within the 4.0mm diameter FOV.

### 136 Image Acquisition

137 Biopsy subsamples were imaged with a  $\mu$ CT50 (Scanco Medical AG, Brüttisellen, Switzerland),  
138 operated with a 0.5mm aluminum filter, 72 $\mu$ A current, 4W power, 55kVp energy, 1.5s integration  
139 time, level 6 data averaging, and with a total of 1500 projections. Images were reconstructed at a  
140 nominal isotropic voxel resolution of 1.2 $\mu$ m with an anti-ring level 8 to minimize center ring artifacts  
141 using the manufacturer's scanner software. Each image consisted of a cylindrical volume equal to the  
142 full diameter of the sample (3.8 +/- 0.05mm) and the height of one scan stack (909 slices = 1.09mm).  
143 The protocol for each sample consisted of three scans: 1. Prescan to warm the sample in the scanner  
144 gantry in an effort to reduce motion artifacts caused by thermal effects (1 hour) 2. Cortical region  
145 scan starting from the lowest point on the centerline of the sample and scanning up one stack (10  
146 hours) 3. Trabecular region scan stack in the middle of the biopsy equidistant between both cortical  
147 walls (10 hours). A visual example of this scanning protocol and resulting images can be seen in  
148 Figure 1.

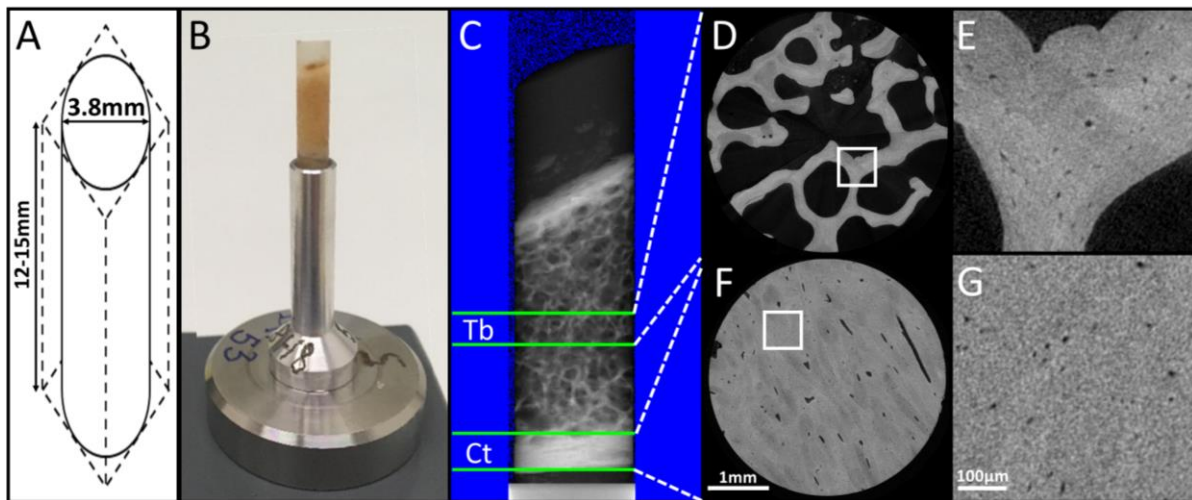

149

150 *Figure 1: A) Schematic of sample core extraction from hemi-cylinder biopsy, which consisted of three linear cuts*  
151 *followed by a lathe turn. B) Photograph of final machined biopsy core inserted into a tolerance-fit sample*  
152 *holder. C) Scout-view overview of entire sample (XZ plane) with the trabecular (Tb) and cortical (Ct) scanned*  
153 *regions identified between the respectively labeled green lines. D) Ultra-high-resolution micro-CT scan of*  
154 *trabecular region cross-section (XY plane) and E) enlarged trabecular subregion. F) Ultra-high-resolution micro-*  
155 *CT scan of cortical region cross-section (XY plane) and G) enlarged cortical subregion.*

156 To determine the optimal beam energy, three samples of trabecular bone were scanned at  
157 three beam energies: 55, 70, and 90kVp. These samples used for beam energy optimization  
158 originated from a separate study [38]; however, they were also human bone biopsies from the iliac  
159 crest and were considered to be comparable with our biopsy group. We aimed to maximize the  
160 image signal-to-noise ratio (SNR) just as previous studies relating to other anatomical bone sites had  
161 done [39]. The linear attenuation coefficient (raw signal) was measured for ten two-dimensional sub-  
162 regions (~0.25mm<sup>2</sup>) at every beam energy in three samples for 90 regions in total. SNR was then  
163 calculated by adapting the Firbank equation to account for two distinct materials as described in  
164 Equation 1 where  $\mu$  is the average coefficient of linear attenuation of bone and the background  
165 (PMMA) and  $\sigma$  is the standard deviation of the background [40].

166

$$\text{SNR} = 0.655 \frac{\mu_{\text{bone}} - \mu_{\text{PMMA}}}{\sigma_{\text{PMMA}}} \quad (1)$$

167 Image Preprocessing



168 Preprocessing of each image consisted of a constrained 3D Gaussian low pass filter ( $\sigma=0.8$ ,  
169 support =1) to reduce noise and was applied using IPL (Scanco Medical AG, Brüttisellen, Switzerland).  
170 Segmentation of lacunar structures was performed by inverting the image after applying a threshold  
171 that was individualized for each image volume, which was necessary due to the large variation in  
172 tissue mineral density (TMD) distributions between samples at this resolution. The lacunar threshold  
173 was determined by fitting a Gaussian distribution to each sample's raw TMD distribution data and  
174 calculating the first critical point ( $g'$ ) of the fitted distribution using a custom Python script (3.7.1,  
175 Python Software Foundation, Delaware, USA). Bone volume (BV) was determined by fixing a  
176 threshold of 520mg HA/ccm, applying to all samples, performing a closing operation, and calculating  
177 the resulting BV using IPL software (Scanco Medical AG, Brüttisellen, Switzerland).

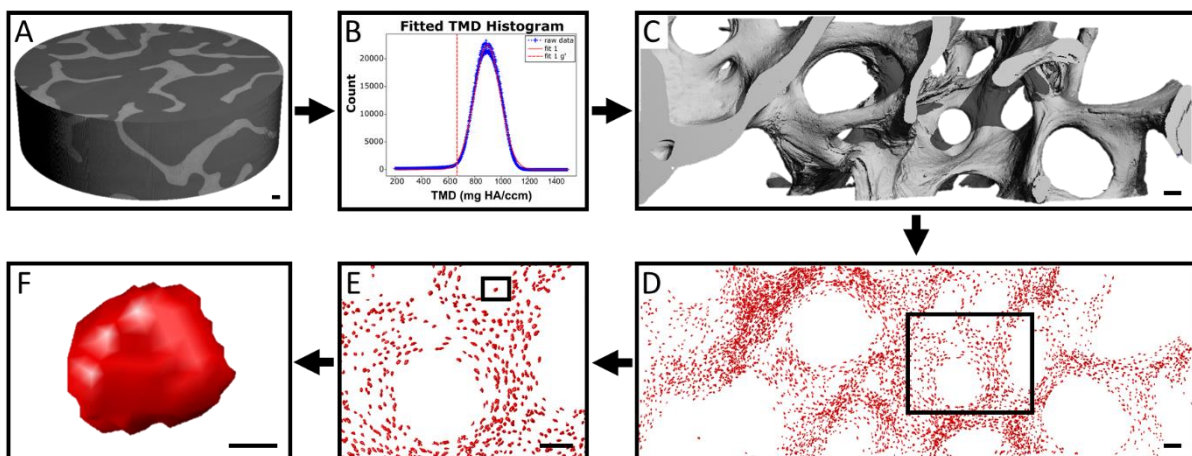

178  
179 *Figure 2: Visual overview of large-scale lacunar segmentation. A) Gaussian filtered, unsegmented, complete micro-CT image*  
180 *stack. B) Sample specific histogram of tissue mineral density (TMD) values fitted by a Gaussian function. A unique lacunar*  
181 *threshold is chosen for each sample at the first critical point of the respective fit by calculating the maximum of the first*  
182 *derivative ( $g'$ ). C) Lacunar threshold calculated with (B) applied to (A). D) Image (C) inverted and component labeled to*  
183 *identify lacunae. E) Enlarged subregion group of lacunae. F) Single visualized lacuna. Scale bar lengths: A-E) 100 $\mu$ m F) 10 $\mu$ m.*

184 All objects smaller than 50 $\mu$ m<sup>3</sup> and larger than 2000 $\mu$ m<sup>3</sup> were removed as to reflect the  
185 range of human lacunar volumes reported in previous histological studies [41]. The lower bound  
186 filters out noise structures while the upper bound excludes larger porosities like Haversian and  
187 Volkmann canals. Similar volumetric ranges have also been implemented in previous studies [42, 43].  
188 Several microcracks, blood vessels, and image ring artifacts escaped the volumetric filter, yet all

189 exhibited similar thin structures with a high object-elongation value. Therefore, these were excluded  
190 by removing all objects with an elongation above a threshold ( $Lc.St > 0.85$ ). All objects sharing a  
191 border with the image edge were also removed to exclude partially cutoff objects.

## 192 Image Morphometry

193 The lacunar morphometries were calculated with a custom Python script, which first  
194 component labeled all lacunar objects, applied a surface mesh to each, and then measured basic  
195 individual parameters. Lacunar density ( $Lc.N/BV$ ) was calculated by normalizing the number of  
196 lacunae ( $Lc.N$ ) to the bone volume ( $BV$ ) and lacunar porosity ( $Lc.TV/BV$ ) by dividing the total volume  
197 of all lacunae by the respective  $BV$ . Local parameters (denoted with  $\langle \rangle$  and first defined by Stauber et  
198 al. [44]) were each normalized to the sample  $Lc.N$  while population-based parameters (denoted with  
199  $[\ ]$ ) were not normalized. Individual lacunar volume ( $Lc.V$ ), lacunar surface area ( $Lc.S$ ), and the Eigen  
200 vectors were determined from the object specific mesh. This mesh was calculated by performing a  
201 triangulation of the surface voxels of the object using Lewiner marching cubes (3.7.1, Python  
202 Software Foundation, scikit-image library, Delaware, USA). The Eigen vectors were then used to  
203 quantify more complex parameters including lacunar stretch ( $Lc.St$ ) and lacunar oblateness ( $Lc.Ob$ ),  
204 which were first defined by Mader et al. [18]. Lacunar equancy ( $Lc.Eq$ ) was the ratio between the  
205 smallest and largest Eigen vectors ( $E3/E1$ ) [21, 45] while lacunar sphericity ( $Lc.Sr$ ) related the lacunar  
206 object to a sphere via the ratio between  $Lc.S$  and  $Lc.V$  [43]. Lacunar angle ( $Lc.\theta$ ) was measured in  
207 degrees and ranged between 0 and 180 degree in relation to an arbitrarily created unit vector that  
208 was held consistent between images.

## 209 Validation

### 210 *Accuracy:*

211 To evaluate the accuracy of the threshold approach, sub-volumes from five samples  
212 consisting of roughly 200 lacunae per region were hand-counted by a trained observer and then  
213 compared with the automatically segmented data at the corresponding sample-specific  $g'$  threshold

214 to calculate true positive, false positive, and false negative rates (TPR, FPR, FNR). All objects were  
215 verified in 3D as depicted in Figure 3 and falsely classified objects were reclassified when appropriate.

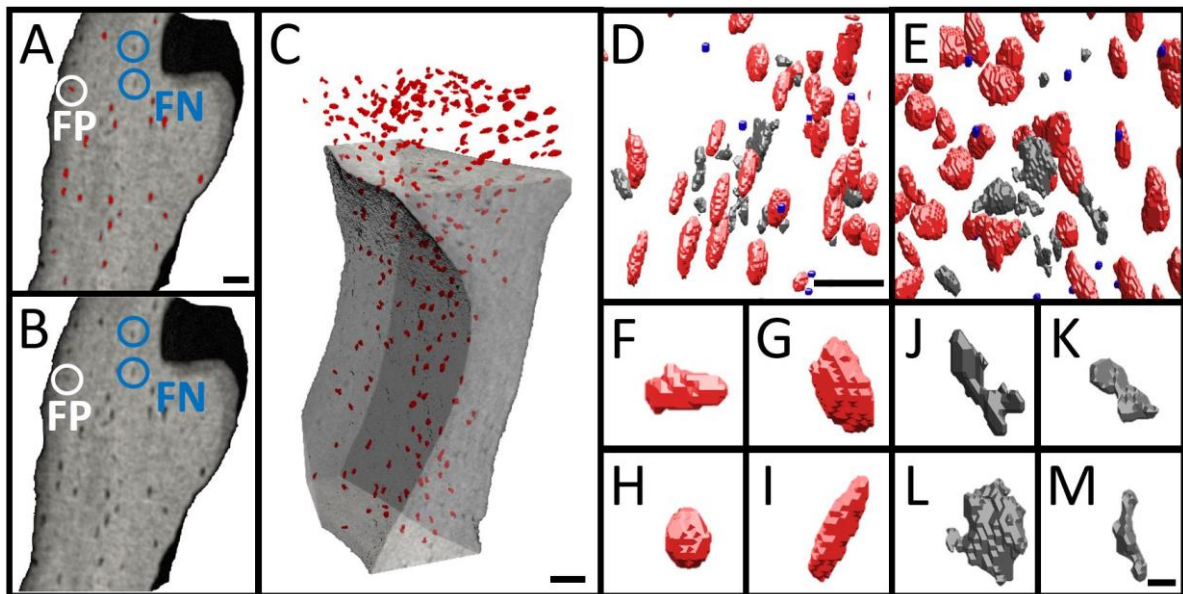

216

217 *Figure 3: Manual vs. automatic lacunar segmentation. A) 3D cutplane of trabecular subregion with*  
218 *automatically segmented objects highlighted in red. Examples of false negatives (FN) circled in blue, false*  
219 *positives (FP) circled in white. B) Same cutplane as (A) used for visual comparison regarding classification of*  
220 *automatically segmented objects, showing same FP and FN as in (A). C) 3D orthographic projection of (A&B)*  
221 *with automatically segmented objects in red. D&E) 3D visualization comparing manual and automatic lacunar*  
222 *segmentation. Red objects = true positives (TP); objects identified as lacunae both manually and automatically.*  
223 *Gray objects = false positives (FP); objects identified as lacunae automatically but rejected manually. Blue*  
224 *spheres = false negatives (FN); objects manually identified as lacunae but rejected by the automatic method. F-*  
225 *I) TP examples. J-M) FP examples. Scalebar A-E) = 50 $\mu$ m; F-M) = 10 $\mu$ m.*

226 *Reproducibility:*

227 In accordance with literature that recommends a sufficient number of degrees of freedom  
228 (DOF) to produce an upper confidence limit of the precision error that is 40% greater than the mean  
229 precision error [35], six samples were measured five times and repositioned between each  
230 measurement for a total of 20 DOF. Reproducibility was evaluated by calculating the precision error

231 (PE<sub>%CV</sub>) and the intraclass correlation coefficient (ICC) for the measured lacunar indices using  
232 Equations 2 – 4.

233 
$$PE_{SD} = \sqrt{\sum_{j=1}^m \frac{SD_j^2}{m}} \quad (2)$$

234

235 
$$PE_{\%CV} = \sqrt{\sum_{j=1}^m \frac{\%CV_j^2}{m}} \quad (3)$$

236

237 
$$ICC = \frac{F_0 - 1}{F_0 + (n - 1)} \quad (4)$$

238 *Sensitivity:*

239 To assess the sensitivity of the method, lacunar morphometric parameters from cortical and  
240 trabecular regions were compared as there are known physiological differences between the  
241 distribution and shape of lacunae in these regions in humans [43, 46]. Because each individual biopsy  
242 contained both cortical and trabecular regions, it was possible to compare lacunae both within  
243 samples and between samples.

#### 244 Statistical Analysis

245 A paired t-test with the necessary Bonferroni correction was performed with respect to  
246 energy-dependent imaging parameters in Table 1. With respect to the precision test, the 95%  
247 confidence interval was calculated for each morphometric parameter using a chi-squared distribution  
248 to gain an understanding of certainty with respect to the PE and ICC reported values in Table 3.  
249 Creating two-parameter plots of the data presented in Table 3 is another way to evaluate the  
250 reproducibility of the imaging method by means of clustering as is depicted in Figure 5. A paired

251 Student's t-test was performed to evaluate regional differences between lacunar parameters that  
252 were normalized to tissue indices ( $p < 0.001$ ). Population-based parameters were not normally  
253 distributed following a Kolmogorov-Smirnov test, and so a non-parametric Mann-Whitney U test was  
254 performed to evaluate population differences ( $p < 0.001$ ). The inter-quartile ranges and medians were  
255 computed for each morphometric parameter.

256

## 257 RESULTS

### 258 Image Acquisition

259 Images captured with a 55kVp beam energy exhibited a significantly higher SNR when  
260 compared to images obtained with a beam energy of 90kVp ( $p < 0.005$ ). The SNR measured with the  
261 70kVp beam energy fell in between the high and low beam energy values and did not differ  
262 significantly from the other energies.

263 *Table 1: Energy dependency of imaging parameters. Energy level 55kVp used as baseline and paired t-test with*  
264 *the necessary Bonferroni correction used to test for significant differences between energy levels in the three*  
265 *following categories: contrast, standard deviation of the image background ( $\sigma_{\text{PMMA}}$ ), and signal-to-noise ratio*  
266 *(SNR). Significantly different ( $p < 0.005$ ) from baseline denoted with (\*) and from 70kVp with (#).*

| Energy (kVp) | Contrast (n=30) | $\sigma_{\text{PMMA}}$ (n=30) | SNR (n=30) |
|--------------|-----------------|-------------------------------|------------|
| 55           | 1.84±0.46       | 0.14±0.02                     | 8.34±2.20  |
| 70           | 1.33±0.33*      | 0.11±0.01*                    | 7.65±1.88  |
| 90           | 0.92±0.23*#     | 0.09±0.01*#                   | 6.67±1.60* |

267

268 As shown in Table 1, both contrast and standard deviation of the background (PMMA in this  
269 case) were inversely proportional to the beam energy. Specifically, the inverse proportionality was  
270 approximately linear with contrast while  $\sigma_{\text{PMMA}}$  was quadratic (Figure 4), both important for the

271 computation of SNR as given in Equation 1. As a ratio of both noise and the standard deviation of the  
272 image background (Equation 1), SNR was less dramatically affected by increasing beam energy. We  
273 therefore set the beam energy to 55kVp for all scans in the study because this setting produced the  
274 highest quality images with the highest contrast at acceptable noise levels.

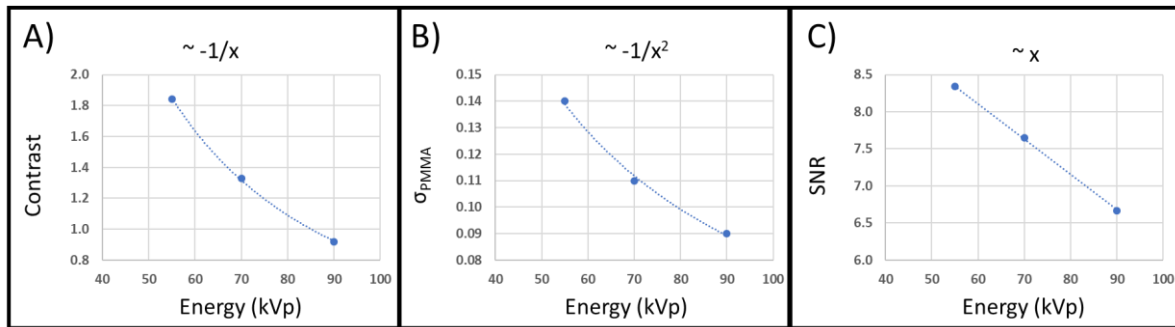

275  
276 *Figure 4: Beam physics relationships. A) Contrast exhibits an inverse relationship with beam energy. B) Standard*  
277 *deviation of the background ( $\sigma_{PMMA}$ ) has an approximate quadratic relationship with beam energy. C) Signal-to-*  
278 *noise ratio is linearly related to beam energy as expected since it is defined as the contrast divided by the  $\sigma_{PMMA}$ .*

279

## 280 Validation

281 *Accuracy:*

282 Automated segmented objects were compared to the manual segmentation to evaluate TPR,  
283 FPR, and FNR measures as seen in Table 2. Objects segmented automatically in each sample revealed  
284 a strong agreement with the lacunae counted manually as is evident by the high TPR and low FPR and  
285 low FNR. Roughly 200 lacunae were present in each sample subregion with sample 1 exhibiting the  
286 highest TPR (93.9%) and lowest FNR (6.1%). Sample 4 had the lowest FPR (0.5%) while sample 3 the  
287 lowest TPR (77.3%). The final accuracy measure was calculated as the mean of the five samples and  
288 was computed to be 89.0% TPR, 3.4% FPR, and 11.0% FNR.

289 *Table 2: Quantification of accuracy measures and their corresponding rates obtained via comparison between*  
290 *manual and automatic lacunar segmentation methods. TPR = True Positive Rate; FPR = False Positive Rate; FNR*  
291 *= False Negative Rate.*

| Sample | TP  | FP | FN | TPR (%) | FPR (%) | FNR (%) |
|--------|-----|----|----|---------|---------|---------|
| 1      | 155 | 9  | 10 | 93.9    | 5.5     | 6.1     |
| 2      | 182 | 11 | 14 | 92.9    | 5.7     | 7.1     |
| 3      | 133 | 3  | 39 | 77.3    | 2.2     | 22.7    |
| 4      | 202 | 1  | 16 | 92.7    | 0.5     | 7.3     |
| 5      | 205 | 7  | 27 | 88.4    | 3.3     | 11.6    |
| Mean   | 175 | 6  | 21 | 89.0    | 3.4     | 11.0    |

292

293 *Reproducibility:*

294 Measurement repeatability is crucial for validation and was quantified for measured lacunae.  
295 Across all lacunar morphometric parameters, precision errors were very low (below 3%) and the ICC  
296 were very high (above 0.980), which indicate that these lacunar measurements are extremely  
297 reproducible. The 95% confidence interval range for precision errors was between 0.67% and 3.68%  
298 while the range for ICC values were between 0.883 and 1.000, which indicates extremely low  
299 measurement variability and high reproducibility.

300 *Table 3: Reported values from the reproducibility analysis (n=6, five repeated measurements). Morphometric*  
 301 *parameters include: lacunar total volume (Lc.TV), lacunar porosity (Lc.TV/BV), lacunar number (Lc.N), lacunar*  
 302 *density (Lc.N/BV), local lacunar volume (<Lc.V>), local lacunar surface area (<Lc.S>), local lacunar stretch*  
 303 *(<Lc.St>), local lacunar oblateness (<Lc.Ob>), local lacunar sphericity (<Lc.Sr>), local lacunar equancy (<Lc.Eq>),*  
 304 *and local lacunar angle (<Lc.θ>). In addition to mean values of each morphometric parameter across the*  
 305 *samples, we report the following for precision errors (PE): standard deviation (PE<sub>SD</sub>) in absolute values,*  
 306 *coefficient of variation (PE<sub>%CV</sub>) of the repeated experiments, and the 95% confidence interval of the variation*  
 307 *(95% CI PE<sub>%CV</sub>). Also reported are the intraclass correlation coefficients (ICC) and the 95% confidence interval of*  
 308 *the ICC for each respective morphometric parameter.*

| Morphometric parameter          | Mean    | PE <sub>SD</sub> | PE <sub>%CV</sub> | 95% CI PE <sub>%CV</sub> | ICC   | 95% CI ICC  |
|---------------------------------|---------|------------------|-------------------|--------------------------|-------|-------------|
| Lc.TV (1000*μm <sup>3</sup> )   | 2,119.3 | 40.2             | 2.77%             | 2.11-4.05%               | 0.997 | 0.992-1.000 |
| Lc.TV/BV (%)                    | 0.5     | 0.009            | 2.52%             | 1.91-3.68%               | 0.989 | 0.966-0.998 |
| Lc.N (1000)                     | 10.03   | 0.2              | 1.86%             | 1.41-2.72%               | 0.999 | 0.996-1.000 |
| Lc.N/BV (1000/mm <sup>3</sup> ) | 22.09   | 0.3              | 1.48%             | 1.12-2.16%               | 0.984 | 0.952-0.997 |
| <Lc.V> (μm <sup>3</sup> )       | 210.5   | 2.5              | 1.33%             | 1.01-1.95%               | 0.991 | 0.970-0.999 |
| <Lc.S> (μm <sup>2</sup> )       | 207.5   | 1.7              | 0.88%             | 0.67-1.29%               | 0.990 | 0.968-0.998 |
| <Lc.St> (1)                     | 0.6     | 0.001            | 0.17%             | 0.13-0.25%               | 0.989 | 0.963-0.998 |
| <Lc.Ob> (1)                     | -0.4    | 0.006            | 1.59%             | 1.21-2.32%               | 0.960 | 0.883-0.994 |
| <Lc.Sr> (1)                     | 0.8     | 0.002            | 0.24%             | 0.18-0.35%               | 0.938 | 0.816-0.990 |
| <Lc.Eq> (1)                     | 0.3     | 0.001            | 0.43%             | 0.33-0.63%               | 0.994 | 0.980-0.999 |
| <Lc.θ> (Degree)                 | 113.8   | 0.8              | 0.66%             | 0.50-0.97%               | 0.980 | 0.938-0.997 |

309

310 Clustering of the individual repeated measurements indicates reproducibility and is especially  
 311 apparent in Figure 5A-B. These parameters also exhibited a very high correlation, which illustrated  
 312 that as bone volume increases so will the number of lacunae and the total lacunar volume. The  
 313 clustering in Figure 5C-D was not nearly as evident across all six samples due to the fact that <Lc.V>  
 314 and <Lc.St> were more difficult to reproduce. As BV/TV increases in Figure 5C-D, measured variability  
 315 decreases between the first and second cluster and then remains approximately constant. The strong  
 316 correlation of Lc.N (R<sup>2</sup> = 0.99) and Lc.TV (R<sup>2</sup> = 0.98) with BV/TV position them as potential lacunar



317 biomarker candidates.  $\langle Lc.V \rangle$  and  $\langle Lc.St \rangle$  were more independent of BV/TV and no correlation was  
318 found.

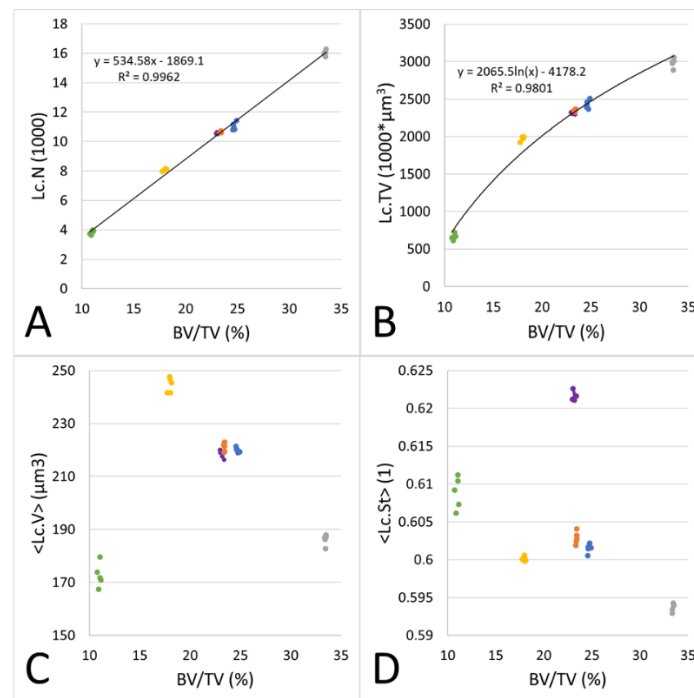

319

320 *Figure 5: Two-parameter plots that demonstrate the reproducibility of the imaging method. Each color*  
321 *represents an individual sample and each data point represents a specific measurement (n=6, with 5 repeated*  
322 *measurements). A) Lacunar number (Lc.N) vs. bone volume (BV/TV). B) Lacunar total volume (Lc.TV) vs. bone*  
323 *volume (BV/TV). C) Local lacunar volume ( $\langle Lc.V \rangle$ ) vs. bone volume (BV/TV). D) Local lacunar stretch ( $\langle Lc.St \rangle$ ) vs.*  
324 *bone volume (BV/TV).*

325 *Sensitivity:*

326 Cortical and trabecular bone regions were measured and compared. More bone was present,  
327 and consequently, more lacunae were present in cortical bone when compared to trabecular bone.  
328 Measured tissue values such as BV, and BV/TV in trabecular regions were consistently lower than  
329 cortical regions as expected since trabecular bone is sparse and cortical bone is compact. Regarding  
330 the global morphometries, which were normally distributed, Lc.N/BV median value in trabecular  
331 bone was nearly half of what it was observed to be in cortical bone (16,611 vs. 26,429,  $p < 0.001$ ).  
332 Similarly, the median value of Lc.TV/BV in trabecular bone was also nearly half of what it was in

333 cortical bone (0.30% vs. 0.58%,  $p < 0.001$ ), again indicating that cortical bone has a significantly higher  
 334 lacunar porosity than trabecular bone. Furthermore, we report in Table 4 that the normalized local  
 335 parameters  $\langle \text{Lc.V} \rangle$  and  $\langle \text{Lc.S} \rangle$  are significantly greater ( $p < 0.001$ ) in cortical bone ( $\langle \text{Lc.V} \rangle = 223 \mu\text{m}^3$ ;  
 336  $\langle \text{Lc.S} \rangle = 233 \mu\text{m}^2$ ) than in trabecular bone ( $\langle \text{Lc.V} \rangle = 178 \mu\text{m}^3$ ;  $\langle \text{Lc.S} \rangle = 194 \mu\text{m}^2$ ). Most population-  
 337 based morphometric parameters were not normally distributed, and consequently we reported the  
 338 median values as well as the interquartile range for all indices to provide a sense of the distribution  
 339 of each parameter in Table 4.

340 *Table 4: Large-scale lacunar morphometric parameters (n=6.57 million for cortical and n=1.14 million for*  
 341 *trabecular). Reported values are the median with interquartile range (25<sup>th</sup> percentile – 75<sup>th</sup> percentile).*  
 342 *Morphometric parameters include: total image volume (TV), total bone volume (BV), ratio of bone volume to*  
 343 *total volume (BV/TV), lacunar porosity (Lc.TV/BV), lacunar number (Lc.N), lacunar density (Lc.N/BV), local*  
 344 *lacunar volume ( $\langle \text{Lc.V} \rangle$ ), local lacunar surface area ( $\langle \text{Lc.S} \rangle$ ), population lacunar volume ([Lc.V]), population*  
 345 *lacunar surface area ([Lc.S]), population lacunar surface area to volume ratio ([Lc.S/Lc.V]), population lacunar*  
 346 *stretch ([Lc.St]), population lacunar oblateness ([Lc.Ob]), population lacunar sphericity ([Lc.Sr]), population*  
 347 *lacunar equancy ([Lc.Eq]), and population lacunar angle ([Lc.θ]). Paired t-test performed for the normally*  
 348 *distributed global and local parameters, (\*) indicates  $p < 0.001$ . Mann-Whitney U test performed on population-*  
 349 *based parameters and (\*) indicates  $p < 0.001$ .*

| Morphometric parameter                           | Trabecular        | Cortical         |
|--------------------------------------------------|-------------------|------------------|
| TV (mm <sup>3</sup> )                            | 15.7 (15.1–15.8)  | 15.7 (15.6–15.9) |
| BV (mm <sup>3</sup> )                            | 2.11 (1.54–2.46)* | 7.68 (6.33–9.70) |
| BV/TV (%)                                        | 14.0 (10.2–18.4)* | 57.8 (43.7–64.9) |
| Lc.TV/BV (%)                                     | 0.30 (0.22–0.38)* | 0.58 (0.51–0.65) |
| Lc.N (1000)                                      | 41.2 (27.7–67.9)* | 252 (175–266)    |
| Lc.N/BV (1000/mm <sup>3</sup> )                  | 16.6 (14.1–18.7)* | 26.4 (23.7–29.3) |
| $\langle \text{Lc.V} \rangle$ (μm <sup>3</sup> ) | 178 (159–197)*    | 223 (189–245)    |
| $\langle \text{Lc.S} \rangle$ (μm <sup>2</sup> ) | 194 (178–211)*    | 233 (216–248)    |
| [Lc.V] (μm <sup>3</sup> )                        | 123 (70.1–230)*   | 116 (63.0–272)   |
| [Lc.S] (μm <sup>2</sup> )                        | 161 (109–245)*    | 164 (105–290)    |
| [Lc.S]/[Lc.V] (1/μm)                             | 1.30 (1.05–1.56)* | 1.41 (1.06–1.66) |

|                 |                       |                      |
|-----------------|-----------------------|----------------------|
| [Lc.St] (1)     | 0.62 (0.53–0.69)*     | 0.61 (0.51–0.69)     |
| [Lc.Ob] (1)     | -0.44 (-0.67– -0.13)* | -0.49 (-0.71– -0.17) |
| [Lc.Sr] (1)     | 0.76 (0.70–0.81)*     | 0.73 (0.66–0.79)     |
| [Lc.Eq] (1)     | 0.29 (0.19–0.45)*     | 0.31 (0.19–0.47)     |
| [Lc.θ] (Degree) | 104 (76.0–131)*       | 107 (77.4–134)       |

350

351 Population-based lacunar parameters were not normally distributed. The interquartile ranges  
352 between regions were similar, yet a non-parametric Mann-Whitney U test revealed significant  
353 differences between cortical and trabecular regions ( $p < 0.001$ ). The measure of sphericity ([Lc.Sr])  
354 was approximately 0.75 for both regions of bone, indicating similarities between the measured  
355 ellipsoids and an idealized sphere. The additional parameters [Lc.Eq], [Lc.St] and [Lc.Ob] allow for the  
356 ellipsoidal lacunar shape to be described in more detail, and the median reported values suggest that  
357 these are indeed ellipsoidal structures in both trabecular and cortical regions. The range of [Lc.Ob] in  
358 trabecular bone was slightly higher than in cortical bone.

359 Figure 6 depicts selected global, local, and population-based morphometries from both  
360 cortical and trabecular regions. When normalized to the analyzed tissue volume, both the lacunar  
361 density and porosity were significantly different between cortical and trabecular regions (Figure 6A-  
362 B) across all 31 samples, further supporting their potential as biomarkers. Local morphometries  
363 ( $\langle Lc.V \rangle$  &  $\langle Lc.S \rangle$ ) were also significantly different between the two regions (Figure 6C-D), yet not as  
364 clearly separated as the global morphometries. Population-based morphometries (Figure 6E-F)  
365 included all lacunar observations across all 31 samples: 1.14 million lacunae in trabecular bone and  
366 6.57 million lacunae in cortical bone. The shape indices [Lc.St] and [Lc.Sr] were chosen to compare  
367 between regions and were also significantly different. A visual comparison is presented in Figure 6G-  
368 H between the samples containing the median Lc.N/BV values from Figure 6A, further illustrating the  
369 differences between regions.

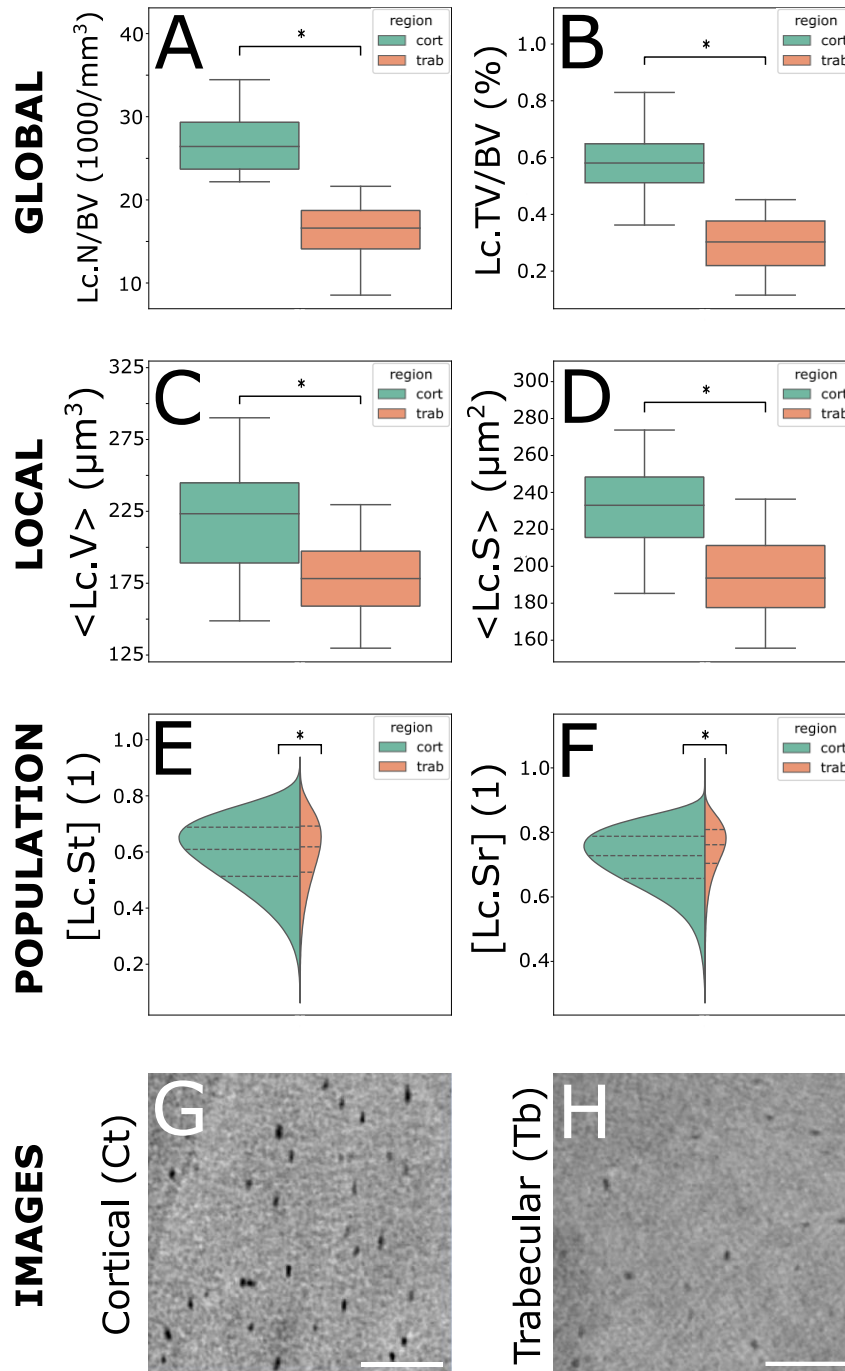

370

371 *Figure 6: Comparison of cortical and trabecular regions regarding lacunar morphometric parameters. Included*  
 372 *in the analysis were 31 samples which comprised of 6.57 million cortical lacunae and 1.14 million trabecular*  
 373 *lacunae. A) Lacunar density ( $Lc.N/BV$ ). B) Lacunar porosity ( $Lc.TV/BV$ ). C) Local lacunar volume ( $\langle Lc.V \rangle$ )*  
 374 *normalized to sample. D) Local lacunar surface area ( $\langle Lc.S \rangle$ ) normalized to sample. E) Population-based local*  
 375 *lacunar stretch ( $[Lc.St]$ ) not normalized to sample. F) Population-based local lacunar stretch ( $[Lc.Sr]$ ) not*  
 376 *normalized to sample. G&H) Micro-CT images from cortical and trabecular regions representing the median*

377 values from plot (A) respectively, scale bar = 100 $\mu$ m. Paired t-test performed on normalized parameter plots (A-  
378 D) and (\*) indicates  $p < 0.001$ . Mann-Whitney U test performed on population-based parameters (E-F) and (\*)  
379 indicates  $p < 0.001$ .

## 380 DISCUSSION

381 Detailed examination of the LCN on a large scale demands a high-resolution 3D-imaging  
382 methodology that is accurate, reproducible, and sensitive. Lacunae must be segmented and  
383 morphometric indices measured accurately and repeatably. Therefore, it is paramount that  
384 researchers select a fully validated imaging methodology for the large-scale assessment of osteocyte  
385 lacunar morphometry. High-resolution desktop micro-CT is an ideal technology for large-scale  
386 investigation of the lacunar network due to its wide accessibility. Micro-CT has been employed for  
387 decades as a standard technology for bone tissue morphometry with nominal voxel resolutions in the  
388 range of 10-40 $\mu$ m [25-28]. However, this technology has evolved in recent years, and with it, the  
389 ability to image higher resolutions on the order of 1 $\mu$ m [47]. Hence, the development of validated  
390 image acquisition, processing, and analysis tools to image lacunar morphometry is a logical  
391 progression of the science as well as being crucial to understanding the biological impact of the LCN  
392 on bone at other hierarchical levels.

393 Segmenting the lacunar structures from the surrounding mineralized bone matrix required  
394 the careful selection of the threshold applied to the image. Typically, a single threshold is chosen by  
395 the user via visual inspection and then applied to all samples in a study. At the tissue level this  
396 method is acceptable when recommended guidelines are carefully followed [48] and was how BV  
397 was calculated in this study. However, due to the wide variation of the TMD distributions between  
398 samples at the 1.2 $\mu$ m resolution, this single-threshold method cannot be applied to all samples when  
399 imaging lacunae (Figure S1). Therefore, our approach was to pragmatically locate a threshold that  
400 was intrinsically linked to the sample specific TMD distribution, compare the resulting segmentation  
401 with manual segmentation, and quantify the accuracy. Previous studies have tried similar individual

402 threshold approaches, which are offset from a reference point of the TMD histogram such as the  
403 mean [49], but we found our specific images responded best to selecting the TMD histogram critical  
404 point for segmentation (Figure S1). While no single segmentation threshold was able to capture all  
405 lacunar structures, the visual comparison in Figure 3 is strikingly good. Alternative descriptors of the  
406 TMD distribution were investigated such as the width of the distribution but did not prove to be as  
407 effective as the first critical point (Figure S2).

408         The range of considered object volumes was also important for lacunar segmentation. This  
409 range varies substantially between studies and could be as narrow as  $50\text{-}610\mu\text{m}^3$  or as wide as  $175\text{-}$   
410  $2000\mu\text{m}^3$  [18, 21, 42, 43, 50, 51]. Previous examinations of histological slides have estimated the  
411 human lacunae to be between  $28\mu\text{m}^3$  and  $1713\mu\text{m}^3$ , yet lacunae observed below  $50\mu\text{m}^3$  were only  
412 found in fracture callus [41]. After evaluating several different volume ranges and comparing both  
413 qualitatively with 2D and 3D images and quantitatively with accuracy measures such as TPR, FPR, and  
414 FNR, we determined a lower limit of  $50\mu\text{m}^3$  to be optimal for lacunar segmentation in human  
415 trabecular and cortical bone [52]. The upper limit was chosen to be  $2000\mu\text{m}^3$  in line with a similar  
416 study [21]. This range has a large impact on the number of lacunae segmented and is particularly  
417 sensitive on the lower limit. This problem is especially pronounced with respect to desktop micro-CT  
418 due to the limited photon count of its X-ray beam technology. Relative to studies conducted with  
419 synchrotron CT systems [18, 42], the desktop micro-CT X-ray beam creates image projections with  
420 fewer photons, which increases the resulting noise, reduces the image quality, and makes  
421 visualization of small lacunae more difficult. A Gaussian filter with a low sigma value of 0.8 was  
422 applied so noise would be reduced while the borders of the lacunae would not be blurred beyond  
423 the recognition of a trained human observer. Several extremely elongated ring artifacts were  
424 observed in segmentations and were successfully removed by implementing an anti-ring  
425 reconstruction filter and applying a shape filter that removed objects with a Lc.St value greater than  
426 0.85 [53].

427           We used ultra-high-resolution desktop micro-CT to image 7.71 million osteocyte lacunae  
428 across cortical and trabecular regions in 31 human iliac crest biopsies. We have observed that  
429 morphometric differences exist between lacunae in cortical and trabecular regions of bone, which  
430 has also been shown in previous studies [43, 46]. Currently, only Akhter et al. [43] have reported  
431 sample matched trabecular and cortical lacunar morphometric parameters in human iliac crest  
432 biopsies. In contrast to their study, we report higher values of Lc.N/BV and Lc.TV/BV in cortical bone  
433 when compared to trabecular bone. However, the narrow volume range they evaluate (50-610 $\mu$ m)  
434 and their analysis of less than 1% of the number of lacunae that we examine severely limits the range  
435 of variation that they could potentially consider. Additionally, we have proven our desktop micro-CT  
436 imaging technique to be accurate, reproducible, and sensitive.

437           We evaluated not only global lacunar parameters related to tissue measures (Figure 6A-B),  
438 but also local (Figure 6C-D) and population-based (Figure 6E-F) values. Population-based  
439 morphometry was not normalized and presents the reader with an undistorted perspective of the  
440 natural variation of certain morphometric indices across millions of lacunae (Figure 6E-F). This further  
441 illustrates the method's sensitivity that we see in Figures 6A-D and also demonstrates the method's  
442 ability to capture the natural variation of lacunae in a large-scale analysis.

443           Manual segmentation was used as our gold-standard for calculating accuracy, because  
444 registration between micro-CT images and typical morphological gold-standards like histology is  
445 extremely difficult. However, we were careful to create the best manual segmentation dataset  
446 possible for comparison. Hernandez et al. have used similar accuracy comparisons in previous  
447 studies and in fact, achieve similar rates of TP, FP and FN to ours [49]. Interestingly, sample 3 in our  
448 accuracy calculation exhibited an inordinately low TPR and high FNR. This was due to a suboptimal  
449 selection of the sample's subregion near the bone surface, which made manual identification of  
450 lacunae slightly more difficult.

451 We observed very low precision errors and high intraclass correlation coefficients with  
452 respect to our five consecutive measurements of six samples. These values were in the same range  
453 as in the study of Hemmatian et al. who investigated the reproducibility of desktop micro-CT for  
454 imaging murine lacunae [47]. The tight clustering of data points when creating two-parameter plots  
455 as seen in Figure 5 further proves the reproducibility of the method. Figure 5A and 5B both exhibit  
456 tight clustering within the measurements for each sample which is what we expect when comparing  
457 lacunar parameters with tissue values like BV/TV. Bone tissue volume is a quantity that micro-CT is  
458 excellent at measuring and hence we would expect it to be extremely reproducible. Physiologically  
459 speaking, we would also expect Lc.N and Lc.TV to increase with increasing total bone volume, which  
460 explains the strong correlation, further adds credibility to the imaging modality, and even positions  
461 the two lacunar parameters as potential biomarker candidates. Yet in Figure 5C and 5D, we note that  
462 the values of each sample are slightly less clustered in comparison and are not correlated. More  
463 specifically, we note that BV/TV remains very consistent but the  $\langle \text{Lc.V} \rangle$  and  $\langle \text{Lc.St} \rangle$  varies. Small  
464 objects are more difficult to mesh and both  $\langle \text{Lc.V} \rangle$  and  $\langle \text{Lc.St} \rangle$  are dependent on the object mesh  
465 which would explain the difficulties with reproduction in comparison to Lc.N and Lc.TV. Hemmatian  
466 et al. also found lacunar measures such as  $\langle \text{Lc.V} \rangle$  to be less reproducible than tissue measures such  
467 as BV/TV [47]. Consequently,  $\langle \text{Lc.V} \rangle$  and  $\langle \text{Lc.St} \rangle$  do not appear to be good biomarker candidates.

468 Previous studies have demonstrated that lacunar morphometric parameters differ between  
469 trabecular and cortical regions of bone [43, 46]. We used this fact to evaluate the sensitivity of our  
470 method by the ability to differentiate lacunae between regions. We report significant differences  
471 between global, local, and population-based parameters including Lc.TV/BV, Lc.N/BV,  $\langle \text{Lc.V} \rangle$ ,  $\langle \text{Lc.S} \rangle$ ,  
472  $[\text{Lc.St}]$ , and  $[\text{Lc.Sr}]$  as seen in Table 4 and Figures 6A-F. Furthermore, Figures 6G-H provide a visual  
473 confirmation of the difference that we report in Figure 6A. Not only do we see that lacunar density is  
474 lower in trabecular regions, but also the lacunae themselves look to be slightly smaller relative to the  
475 cortical regions. This would indicate that lacunae in trabecular regions also consist of lower total  
476 porosity (Lc.TV/BV), volume ( $\langle \text{Lc.V} \rangle$ ), and surface area ( $\langle \text{Lc.S} \rangle$ ). These visual differences further



477 support our claim that the method is sensitive and reflects the statistically significant differences that  
478 we report in Figures 6A-D.

479 The largest limitation of this study was the inability to compare extracted lacunar  
480 morphometry from our ultra-high-resolution desktop micro-CT images with a higher resolution  
481 technology such as FIB/SEM. This would have allowed for an accuracy measure not only with respect  
482 to the lacunae segmented, but also the accuracy of morphometric parameters such as <Lc.V> and  
483 <Lc.S>. Additionally, the segmented lacunar data was very sensitive to the selection of the lower  
484 volumetric bound. This was difficult to select since volumetric data from previous studies regarding  
485 the distinction between a lacuna and a micropore is limited. Finally, the precision study required  
486 weeks of scanning time and consequently was only performed on trabecular bone.

487

## 488 **CONCLUSION**

489 We present a new, and rigorously validated high-throughput method to assess osteocyte  
490 lacunar morphometry in human bone samples. We use ultra-high-resolution desktop micro-CT, an  
491 individualized histogram-based segmentation procedure, and a custom evaluation algorithm to  
492 calculate global and local morphometric parameters of 7.71 million lacunae in two distinct regions of  
493 31 human iliac crest bone samples, revealing two potential biomarkers. The validation of our method  
494 demonstrates high degrees of accuracy, precision, and sensitivity. Therefore, our new image  
495 acquisition and evaluation methodologies greatly expand the number of investigable hypotheses  
496 surrounding osteocyte lacunae, while simultaneously employing a widely accessible and mature  
497 imaging technology – desktop micro-CT.

498

## 499 **ACKNOWLEDGEMENTS**

500           The authors would like to thank the Joint Scoliosis Research Center of The Chinese University  
501 of Hong Kong and Nanjing University, Hong Kong & Nanjing, China for their joint efforts on providing  
502 and processing the bone biopsies used for beam energy optimization. We would also like to thank  
503 Peter Schwilch for assisting with biopsy machining and Dr. Patrik Christen for his mentoring.

504

## 505 REFERENCES

- 506 [1] J. Wolff, Das Gesetz der Transformation der Knochen, DMW-Deutsche Medizinische  
507 Wochenschrift 19(47) (1892) 1222-1224.
- 508 [2] W. Roux, Der Kampf der Theile im Organismus: ein Beitrag zur Vervollständigung der  
509 mechanischen Zweckmässigkeitslehre, W. Engelmann 1881.
- 510 [3] L.F. Bonewald, The amazing osteocyte, *J Bone Miner Res* 26(2) (2011) 229-38.
- 511 [4] P.R. Buenzli, N.A. Sims, Quantifying the osteocyte network in the human skeleton, *Bone* 75(79)  
512 (2015) 144-50.
- 513 [5] J. Gluhak-Heinrich, L. Ye, L.F. Bonewald, J.Q. Feng, M. MacDougall, S.E. Harris, D. Pavlin,  
514 Mechanical loading stimulates dentin matrix protein 1 (DMP1) expression in osteocytes in vivo, *J*  
515 *Bone Miner Res* 18(5) (2003) 807-17.
- 516 [6] A.G. Robling, P.J. Niziolek, L.A. Baldrige, K.W. Condon, M.R. Allen, I. Alam, S.M. Mantila, J.  
517 Gluhak-Heinrich, T.M. Bellido, S.E. Harris, C.H. Turner, Mechanical stimulation of bone in vivo reduces  
518 osteocyte expression of Sost/sclerostin, *J Biol Chem* 283(9) (2008) 5866-75.
- 519 [7] T.M. Skerry, L. Bitensky, J. Chayen, L.E. Lanyon, Early strain-related changes in enzyme activity in  
520 osteocytes following bone loading in vivo, *J Bone Miner Res* 4(5) (1989) 783-8.
- 521 [8] L. Lanyon, Osteocytes, strain detection, bone modeling and remodeling, *Calcified tissue*  
522 *international* 53(1) (1993) S102-S107.
- 523 [9] F.A. Schulte, D. Ruffoni, F.M. Lambers, D. Christen, D.J. Webster, G. Kuhn, R. Müller, Local  
524 mechanical stimuli regulate bone formation and resorption in mice at the tissue level, *PLoS One* 8(4)  
525 (2013) e62172.
- 526 [10] R. Huiskes, R. Ruimerman, G.H. van Lenthe, J.D. Janssen, Effects of mechanical forces on  
527 maintenance and adaptation of form in trabecular bone, *Nature* 405(6787) (2000) 704-6.
- 528 [11] S. Hirose, M. Li, T. Kojima, P. Henrique, L. de Freitas, S. Ubaidus, K. Oda, C. Saito, N. Amizuka, A  
529 histological assessment on the distribution of the osteocytic lacunar canalicular system using silver  
530 staining, *J. Bone Miner. Metab.* 25(6) (2007) 374-382.
- 531 [12] C. Palumbo, A 3-dimensional ultrastructural-study of osteoid-osteocytes in the tibia of chick-  
532 embryos, *Cell Tissue Res.* 246(1) (1986) 125-131.
- 533 [13] G. Marotti, F. Remaggi, D. Zaffe, Quantitative investigation on osteocyte canaliculi in human  
534 compact and spongy bone, *Bone* 6(5) (1985) 335-337.
- 535 [14] D.J. Kubek, V.H. Gattone, M.R. Allen, Methodological Assessment of Acid-Etching for Visualizing  
536 the Osteocyte Lacunar-Canalicular Networks Using Scanning Electron Microscopy, *Microsc. Res. Tech.*  
537 73(3) (2010) 182-186.
- 538 [15] C.M. Heveran, A. Rauff, K.B. King, R.D. Carpenter, V.L. Ferguson, A new open-source tool for  
539 measuring 3D osteocyte lacunar geometries from confocal laser scanning microscopy reveals age-  
540 related changes to lacunar size and shape in cortical mouse bone, *Bone* 110 (2018) 115-127.
- 541 [16] X.H. Lai, C. Price, S. Modla, W.R. Thompson, J. Caplan, C.B. Kirn-Safran, L.Y. Wang, The  
542 dependences of osteocyte network on bone compartment, age, and disease, *Bone Res.* 3 (2015) 11.

- 543 [17] F. Repp, P. Kollmannsberger, A. Roschger, M. Kerschnitzki, A. Berzlanovich, G.M. Gruber, P.  
544 Roschger, W. Wagermaier, R. Weinkamer, Spatial heterogeneity in the canalicular density of the  
545 osteocyte network in human osteons, *Bone reports* 6 (2017) 101-108.
- 546 [18] K.S. Mader, P. Schneider, R. Müller, M. Stambanoni, A quantitative framework for the 3D  
547 characterization of the osteocyte lacunar system, *Bone* 57(1) (2013) 142-54.
- 548 [19] M.G. Ascenzi, J. Gill, A. Lomovtsev, Orientation of collagen at the osteocyte lacunae in human  
549 secondary osteons, *Journal of Biomechanics* 41(16) (2008) 3426-3435.
- 550 [20] H.M. Britz, Y. Carter, J. Jokihaara, O.V. Leppanen, T.L.N. Jarvinen, G. Belev, D.M.L. Cooper,  
551 Prolonged unloading in growing rats reduces cortical osteocyte lacunar density and volume in the  
552 distal tibia, *Bone* 51(5) (2012) 913-919.
- 553 [21] Y. Carter, C.D.L. Thomas, J.G. Clement, A.G. Peele, K. Hannah, D.M.L. Cooper, Variation in  
554 osteocyte lacunar morphology and density in the human femur - a synchrotron radiation micro-CT  
555 study, *Bone* 52(1) (2013) 126-132.
- 556 [22] P. Schneider, M. Meier, R. Wepf, R. Müller, Towards quantitative 3D imaging of the osteocyte  
557 lacuno-canalicular network, *Bone* 47(5) (2010) 848-858.
- 558 [23] M. Langer, A. Pacureanu, H. Suhonen, Q. Grimal, P. Cloetens, F. Peyrin, X-Ray Phase  
559 Nanotomography Resolves the 3D Human Bone Ultrastructure, *Plos One* 7(8) (2012) 7.
- 560 [24] M. Kerschnitzki, W. Wagermaier, P. Roschger, J. Seto, R. Shahar, G.N. Duda, S. Mundlos, P. Fratzl,  
561 The organization of the osteocyte network mirrors the extracellular matrix orientation in bone, *J*  
562 *Struct Biol* 173(2) (2011) 303-311.
- 563 [25] L.P. Bakalova, C.M. Andreasen, J.S. Thomsen, A. Bruel, E.M. Hauge, B.J. Kiil, J.M. Delaisse, T.L.  
564 Andersen, D.M. Ph, Relating Intracortical Bone Mechanics to Pore Morphology and Remodeling  
565 Characteristics in the Human Fibula, *J Bone Miner Res* (2018).
- 566 [26] M.L. Bouxsein, S.K. Boyd, B.A. Christiansen, R.E. Guldborg, K.J. Jepsen, R. Müller, Guidelines for  
567 Assessment of Bone Microstructure in Rodents Using Micro-Computed Tomography, *Journal of Bone*  
568 *and Mineral Research* 25(7) (2010) 1468-1486.
- 569 [27] T. Hildebrand, A. Laib, R. Müller, J. Dequeker, P. Ruegsegger, Direct three-dimensional  
570 morphometric analysis of human cancellous bone: Microstructural data from spine, femur, iliac crest,  
571 and calcaneus, *Journal of Bone and Mineral Research* 14(7) (1999) 1167-1174.
- 572 [28] R. Müller, H. Van Campenhout, B. Van Damme, G. Van Der Perre, J. Dequeker, T. Hildebrand, P.  
573 Ruegsegger, Morphometric analysis of human bone biopsies: A quantitative structural comparison of  
574 histological sections and micro-computed tomography, *Bone* 23(1) (1998) 59-66.
- 575 [29] P. Schneider, M. Stauber, R. Voide, M. Stambanoni, L.R. Donahue, R. Müller, Ultrastructural  
576 properties in cortical bone vary greatly in two inbred strains of mice as assessed by synchrotron light  
577 based micro- and Nano-CT, *Journal of Bone and Mineral Research* 22(10) (2007) 1557-1570.
- 578 [30] Y. Sugawara, H. Kamioka, T. Honjo, K. Tezuka, T. Takano-Yamamoto, Three-dimensional  
579 reconstruction of chick calvarial osteocytes and their cell processes using confocal microscopy, *Bone*  
580 36(5) (2005) 877-883.
- 581 [31] R.P. van Hove, P.A. Nolte, A. Vatsa, C.M. Semeins, P.L. Salmon, T.H. Smit, J. Klein-Nulend,  
582 Osteocyte morphology in human tibiae of different bone pathologies with different bone mineral  
583 density - Is there a role for mechanosensing?, *Bone* 45(2) (2009) 321-329.
- 584 [32] A. Vatsa, R.G. Breuls, C.M. Semeins, P.L. Salmon, T.H. Smit, J. Klein-Nulend, Osteocyte  
585 morphology in fibula and calvaria - Is there a role for mechanosensing?, *Bone* 43(3) (2008) 452-458.
- 586 [33] S. Suniaga, T. Rolvien, A. vom Scheidt, I.A.K. Fiedler, H.A. Bale, A. Huysseune, P.E. Witten, M.  
587 Amling, B. Busse, Increased mechanical loading through controlled swimming exercise induces bone  
588 formation and mineralization in adult zebrafish, *Sci Rep* 8 (2018) 13.
- 589 [34] B. Ay, K. Parolia, R.S. Liddell, Y.S. Qiu, G. Grasselli, D.M.L. Cooper, J.E. Davies, Hyperglycemia  
590 compromises Rat Cortical Bone by Increasing Osteocyte Lacunar Density and Decreasing Vascular  
591 Canal Volume, *Commun. Biol.* 3(1) (2020) 9.
- 592 [35] C.-C. Glüer, G. Blake, Y. Lu, B. Blunt, M. Jergas, H. Genant, Accurate assessment of precision  
593 errors: how to measure the reproducibility of bone densitometry techniques, *Osteoporosis*  
594 *International* 5(4) (1995) 262-270.

- 595 [36] A. Cohen, D.W. Dempster, R.R. Recker, E.M. Stein, J.M. Lappe, H. Zhou, A.J. Wirth, G.H. van  
596 Lenthe, T. Kohler, A. Zwahlen, R. Müller, C.J. Rosen, S. Cremers, T.L. Nickolas, D.J. McMahon, H.  
597 Rogers, R.B. Staron, J. LeMaster, E. Shane, Abnormal bone microarchitecture and evidence of  
598 osteoblast dysfunction in premenopausal women with idiopathic osteoporosis, *J Clin Endocrinol*  
599 *Metab* 96(10) (2011) 3095-105.
- 600 [37] A. Cohen, R.R. Recker, J. Lappe, D.W. Dempster, S. Cremers, D.J. McMahon, E.M. Stein, J.  
601 Fleischer, C.J. Rosen, H. Rogers, R.B. Staron, J. Lemaster, E. Shane, Premenopausal women with  
602 idiopathic low-trauma fractures and/or low bone mineral density, *Osteoporos Int* 23(1) (2012) 171-  
603 82.
- 604 [38] H.X. Chen, J.J. Zhang, Y.J. Wang, K.Y. Cheuk, A.L.H. Hung, T.P. Lam, Y. Qiu, J.Q. Feng, W.Y.W. Lee,  
605 J.C.Y. Cheng, Abnormal lacuno-canalicular network and negative correlation between serum  
606 osteocalcin and Cobb angle indicate abnormal osteocyte function in adolescent idiopathic scoliosis,  
607 *Faseb J.* 33(12) (2019) 13882-13892.
- 608 [39] M. Mashiatulla, R.D. Ross, D.R. Sumner, Validation of cortical bone mineral density distribution  
609 using micro-computed tomography, *Bone* 99 (2017) 53-61.
- 610 [40] M. Firbank, A. Coulthard, R. Harrison, E. Williams, A comparison of two methods for measuring  
611 the signal to noise ratio on MR images, *Physics in medicine and biology* 44(12) (1999) N261.
- 612 [41] B.R. McCreadie, S.J. Hollister, M.B. Schaffler, S.A. Goldstein, Osteocyte lacuna size and shape in  
613 women with and without osteoporotic fracture, *Journal of Biomechanics* 37(4) (2004) 563-572.
- 614 [42] F.L. Bach-Gansmo, A. Bruel, M.V. Jensen, E.N. Ebbesen, H. Birkedal, J.S. Thomsen, Osteocyte  
615 lacunar properties and cortical microstructure in human iliac crest as a function of age and sex, *Bone*  
616 91 (2016) 11-19.
- 617 [43] M.P. Akhter, D. Kimmel, J. Lappe, R. Recker, Effect of Macroanatomic Bone Type and Estrogen  
618 Loss on Osteocyte Lacunar Properties in Healthy Adult Women, *Calcified Tissue International* (2017)  
619 1-12.
- 620 [44] M. Stauber, R. Müller, Volumetric spatial decomposition of trabecular bone into rods and plates  
621 - A new method for local bone morphometry, *Bone* 38(4) (2006) 475-484.
- 622 [45] A. Carriero, M. Doube, M. Vogt, B. Busse, J. Zustin, A. Levchuk, P. Schneider, R. Müller, S.J.  
623 Shefelbine, Altered lacunar and vascular porosity in osteogenesis imperfecta mouse bone as revealed  
624 by synchrotron tomography contributes to bone fragility, *Bone* 61 (2014) 116-124.
- 625 [46] P. Milovanovic, B. Busse, Inter-site Variability of the Human Osteocyte Lacunar Network:  
626 Implications for Bone Quality, *Curr Osteoporos Rep* (2019).
- 627 [47] H. Hemmatian, M.R. Laurent, S. Ghazanfari, D. Vanderschueren, A.D. Bakker, J. Klein-Nulend,  
628 G.H. van Lenthe, Accuracy and reproducibility of mouse cortical bone microporosity as quantified by  
629 desktop microcomputed tomography, *Plos One* 12(8) (2017).
- 630 [48] M.L. Bouxsein, S.K. Boyd, B.A. Christiansen, R.E. Guldborg, K.J. Jepsen, R. Müller, Guidelines for  
631 assessment of bone microstructure in rodents using micro-computed tomography, *J Bone Miner Res*  
632 25(7) (2010) 1468-86.
- 633 [49] E.N. Cresswell, T.M. Nguyen, M.W. Horsfield, A.J. Alepuz, T.A. Metzger, G.L. Niebur, C.J.  
634 Hernandez, Mechanically induced bone formation is not sensitive to local osteocyte density in rat  
635 vertebral cancellous bone, *J Orthop Res* (2017).
- 636 [50] A. Levchuk, P. Schneider, M. Meier, P. Vogel, F. Donaldson, R. Müller, An Automated Step-Wise  
637 Micro-Compression Device for 3D Dynamic Image-Guided Failure Assessment of Bone Tissue on a  
638 Microstructural Level Using Time-Lapsed Tomography, *Frontiers in Materials* 5 (2018) 14.
- 639 [51] S.M. Tommasini, A. Trinward, A.S. Acerbo, F. De Carlo, L.M. Miller, S. Judex, Changes in  
640 intracortical microporosities induced by pharmaceutical treatment of osteoporosis as detected by  
641 high resolution micro-CT, *Bone* 50(3) (2012) 596-604.
- 642 [52] B.A.a.R.M. E. Goff, A novel shape filter for lacunar imaging in human bone using ultra-high-  
643 resolution desktop micro-CT, in: M.O. P. Nithiarasu, and M. Oshima (Ed.) 6th International  
644 Conference on Computational and Mathematical Biomedical Engineering (CMBE 2019), Sendai City,  
645 Japan, 2019, pp. 651-654.

646 [53] J. Sijbers, A. Postnov, Reduction of ring artefacts in high resolution micro-CT reconstructions,  
647 Physics in Medicine and Biology 49(14) (2004) N247-N253.

648

649 **SUPPLEMENTARY DOCUMENT**

650 Below are several figures which provide additional information regarding the specifics of the imaging  
651 methodology.

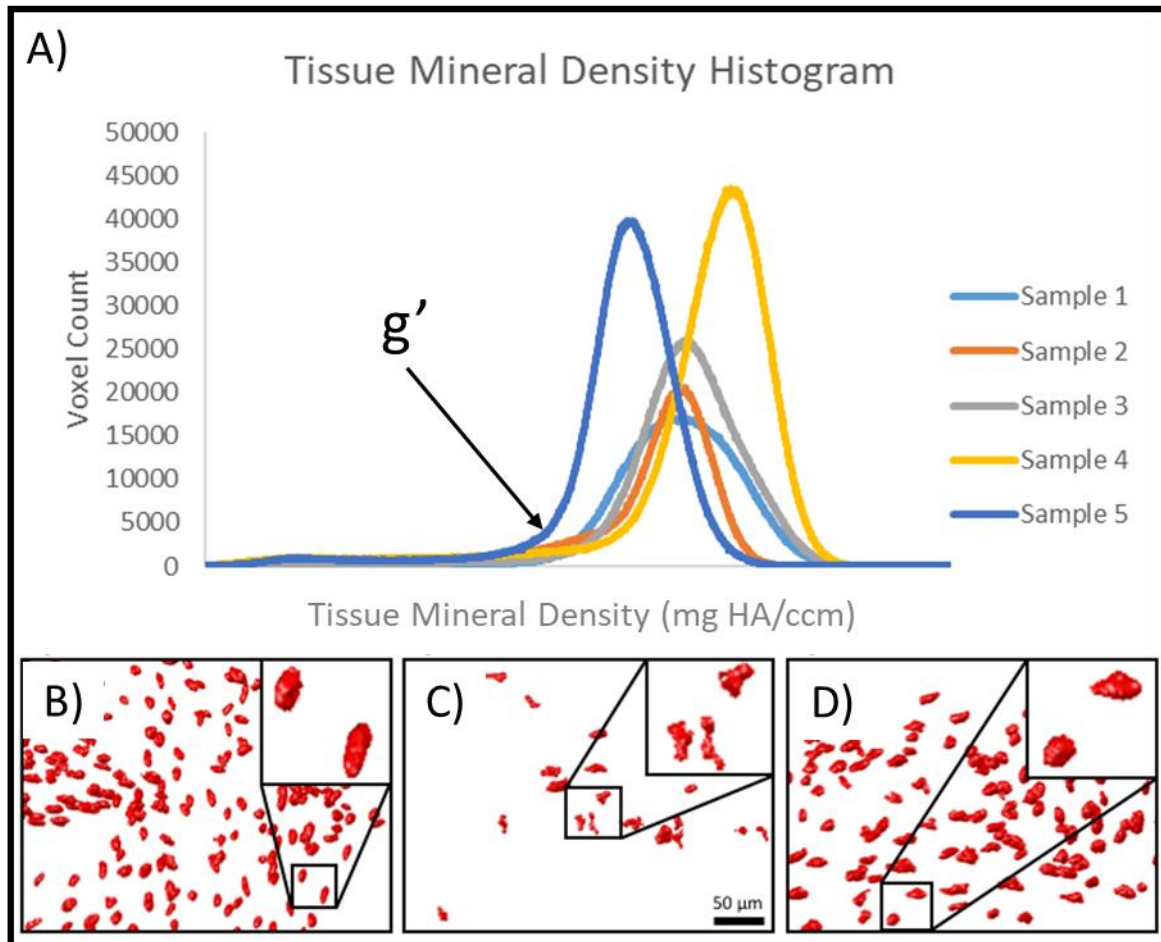

652

653 *Figure S1: A) TMD histograms for several samples where  $g'$  is the critical point. B) Segmented lacunae using a fixed threshold*  
654 *applied to sample 1. C) Segmented lacunae using the same fixed threshold that was applied to sample 1 to sample 2. D)*  
655 *Individualized threshold approach ( $g'$ ) calculated for sample 2 and the resulting segmented lacunae.*

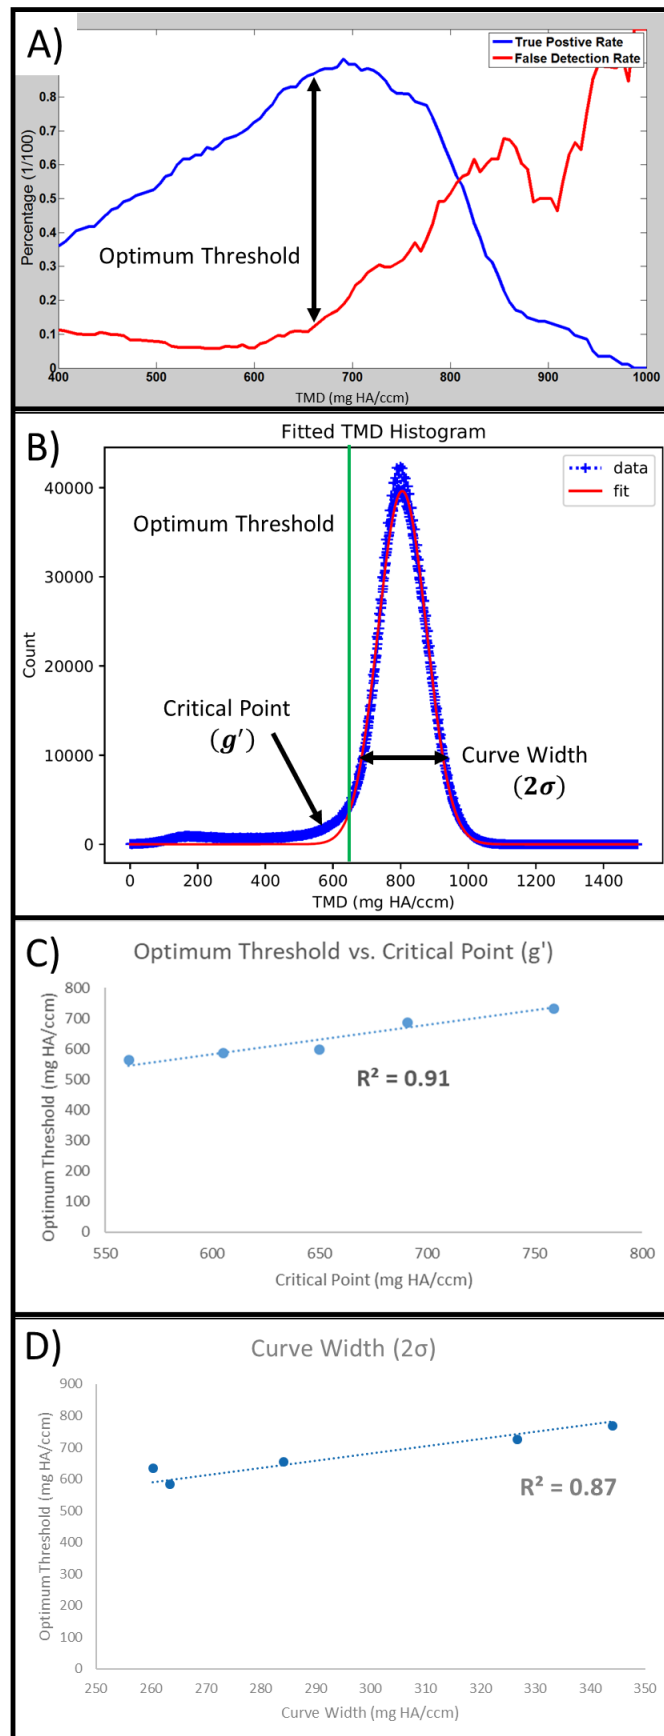

656

657 *Figure S2: Individualized threshold selection. A) Iterative application of many single thresholds and each compared with the*  
658 *manual segmentation 3D coordinates of a given image subregion. Optimum threshold was defined as the single threshold*



659 that maximized the true positive rate and minimized the false detection rate. B) Typical TMD histogram of the bone biopsy's  
660 micro-CT image. Optimum threshold (green) determined from (A) and the distribution characteristics including the critical  
661 point ( $g'$ ) and curve width ( $2\sigma$ ) were calculated from the Gaussian fit of the data. C) Correlation between the optimum  
662 threshold for each of the five manually segmented subregions and the corresponding critical point ( $g'$ ) from each respective  
663 TMD histogram. D) Correlation between the optimum threshold for each of the five manually segmented subregions and the  
664 corresponding distribution width ( $2\sigma$ ) from each respective TMD histogram.

665

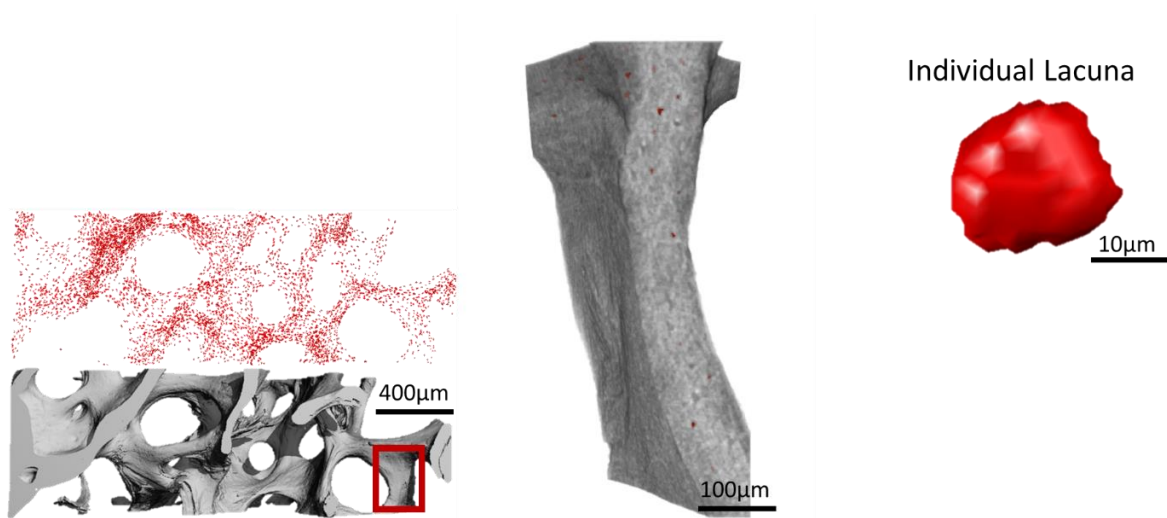

666

667 *Figure S3: Animation of lacunar segmentation from the tissue level down to the individual cell level (see powerpoint file).*
